# Supplementary material for: Electroresponsive structuring and friction of a non-halogenated ionic liquid in a polar solvent: effect of concentration
Source: Royal Society of Chemistry journal article supplement (doi:10.1039/d0cp02736g), 2020-01-01
Supplement: d0cp02736g1.pdf [file d0cp02736g1.pdf]

## Supplementary information for “Electroresponsive structuring and friction of a non-halogenated ionic liquid in a polar solvent: Effect of concentration”

Georgia A. Pilkington<sup>a,\*</sup>, Anna Oleshkevych<sup>a</sup>, Patricia Pedraz<sup>a</sup>, Seiya Watanabe<sup>a,†</sup>, Milad Radiom<sup>a</sup>, Akepati Bhaskar Reddy<sup>b</sup>, Alexei Vorobiev<sup>c</sup>, Sergei Glavatskih<sup>b,d</sup>, and Mark W. Rutland<sup>a,e</sup>

<sup>a</sup>Division of Surface and Corrosion Science, School of Engineering Sciences in Chemistry, Biotechnology and Health, KTH Royal Institute of Technology, SE-100 44 Stockholm, Sweden. <sup>b</sup>System and Component Design, Department of Machine Design, KTH Royal Institute of Technology, SE-100 44 Stockholm, Sweden. <sup>c</sup>Department of Physics and Astronomy, Division of Materials Physics, Uppsala University, Uppsala, Sweden. <sup>d</sup>Royal Institute of Technology, SE-100 44 Stockholm, Sweden. <sup>e</sup>Department of Electrical Energy, Metals, Mechanical Constructions and Systems, Ghent University, B-9052 Ghent, Belgium. <sup>f</sup>Surfaces, Processes and Formulation, RISE Research Institutes of Sweden, SE-100 44 Stockholm, Sweden.

\*Correspondence: georgiap@kth.se

<sup>†</sup>Current address: Tokyo University of Science, Department of Mechanical Engineering, 6-3-1 Nijuku, Katsushika-ku, Tokyo 125-8585, Japan

### Example neutron reflectivity of a gold electrode in air

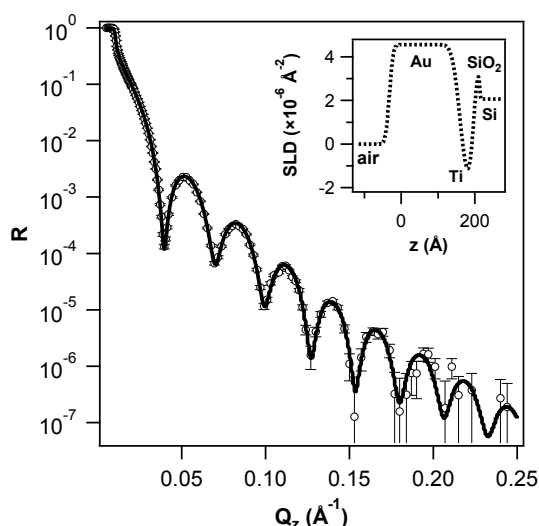

**Figure S1.** Example of the normalised reflectivity for a gold electrode in air. The symbols represent experimental data, while the solid line represents a fitted scattering length density (SLD) model fit to the data. The inset shows the corresponding SLD profile. This block was used for NR measurements in 20% [P<sub>6,6,6,14</sub>][BMB] in PC.

**Table S1.** Example fitted parameters for a gold electrode in air corresponding to the model fit (solid line) presented in Fig. S1.

| Layer            | SLD ( $\times 10^{-6} \text{Å}^{-2}$ ) | Thickness (Å) | Roughness (Å) |
|------------------|----------------------------------------|---------------|---------------|
| Au               | 4.56                                   | 190.0         | 8.35          |
| Ti               | -1.91                                  | 37.2          | 15.9          |
| SiO <sub>2</sub> | 3.47                                   | 17.3          | 8.93          |
| Si               | 2.07                                   | ∞             | 2.09          |

## Neutron reflectivity of pure PC

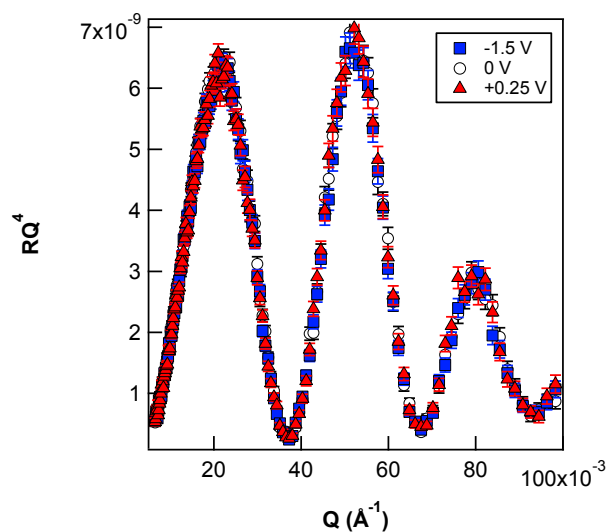

**Figure S2.** Neutron reflectivity of pure PC at a gold electrode for different applied potentials plotted as  $RQ^4$  showing no electrochemical response. This data was collected on the reflectivity beamline INTER at the ISIS Facility, Rutherford Appleton Laboratory, UK.<sup>44</sup>

## SLD model parameters obtained from best-fits to NR measurements across IL solutions

**Table S2.** Fitted parameters for 5% w/w  $[P_{6,6,6,14}][BMB]$  in PC solution corresponding to the model fits (solid lines) presented in Fig. 2.

| Potential | SLD ( $\times 10^{-6} \text{Å}^{-2}$ ) | Thickness (Å) | Gold/IL Roughness (Å) | IL/Bulk Roughness (Å) |
|-----------|----------------------------------------|---------------|-----------------------|-----------------------|
| 0         | 1.90                                   | 24.8          | 14.3                  | 13.1                  |
| -1.5      | 1.86                                   | 24.2          | 14.0                  | 13.0                  |
| +0.25     | 2.04                                   | 28.3          | 14.0                  | 12.1                  |

**Table S3.** Fitted parameters for 10% w/w  $[P_{6,6,6,14}][BMB]$  in PC solution corresponding to the model fits (solid lines) presented in Fig. 3.

| Potential | SLD ( $\times 10^{-6} \text{Å}^{-2}$ ) | Thickness (Å) | Gold/IL Roughness (Å) | IL/Bulk Roughness (Å) |
|-----------|----------------------------------------|---------------|-----------------------|-----------------------|
| 0         | 2.94                                   | 23.8          | 15.5                  | 7.49                  |
| -1.5      | 2.34                                   | 22.2          | 13.3                  | 6.97                  |
| +0.25     | 2.68                                   | 26.8          | 13.6                  | 14.2                  |

**Table S4.** Fitted parameters for 20% w/w [P<sub>6,6,6,14</sub>][BMB] in PC solution corresponding to the model fits (solid lines) presented in Fig. 4.

| Potential | SLD ( $\times 10^{-6} \text{Å}^{-2}$ ) | Thickness (Å) | Gold/IL Roughness (Å) | IL/Bulk Roughness (Å) |
|-----------|----------------------------------------|---------------|-----------------------|-----------------------|
| 0         | 1.34                                   | 28.1          | 8.35                  | 10.2                  |
| -1.5      | 0.70                                   | 29.0          | 8.54                  | 12.3                  |
| +0.25     | 2.25                                   | 53.2          | 9.13                  | 18.9                  |

### Electrochemical Impedance Spectroscopy analysis

(a)

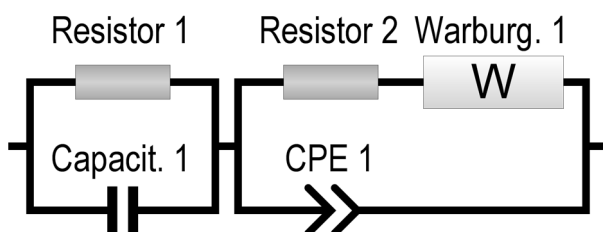

(b)

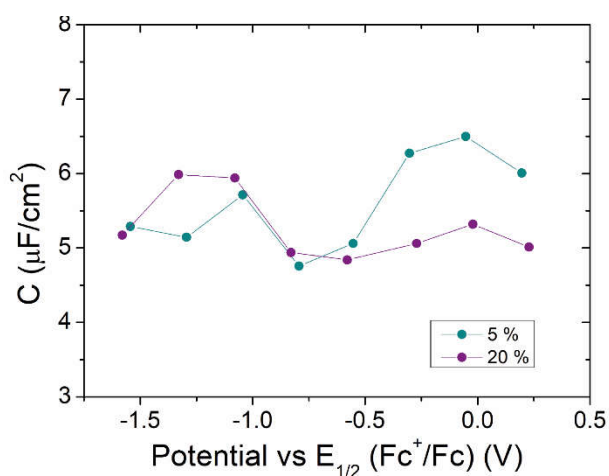

**Figure S3.** (a) Equivalent circuit used to model experimental EIS data. Resistor 1 represents contributions by cables, internal contact resistances inside the cell and the ion movement in the sample's bulk. Capacitor 1 accounts for the contributions by cables, stray capacitance due to the 3-electrode configuration and the bulk capacitance. The constant phase element 1 (= CPE 1) represents the differential interfacial capacitance of the sample/gold electrode interface, while resistor 2 and Warburg element 1 is related to diffusion processes at the interface. (b) Differential capacitance as a function of applied potential for solutions of 5 % and 20% [P<sub>6,6,6,14</sub>][BMB] in PC on gold.

## Cyclic voltammetry

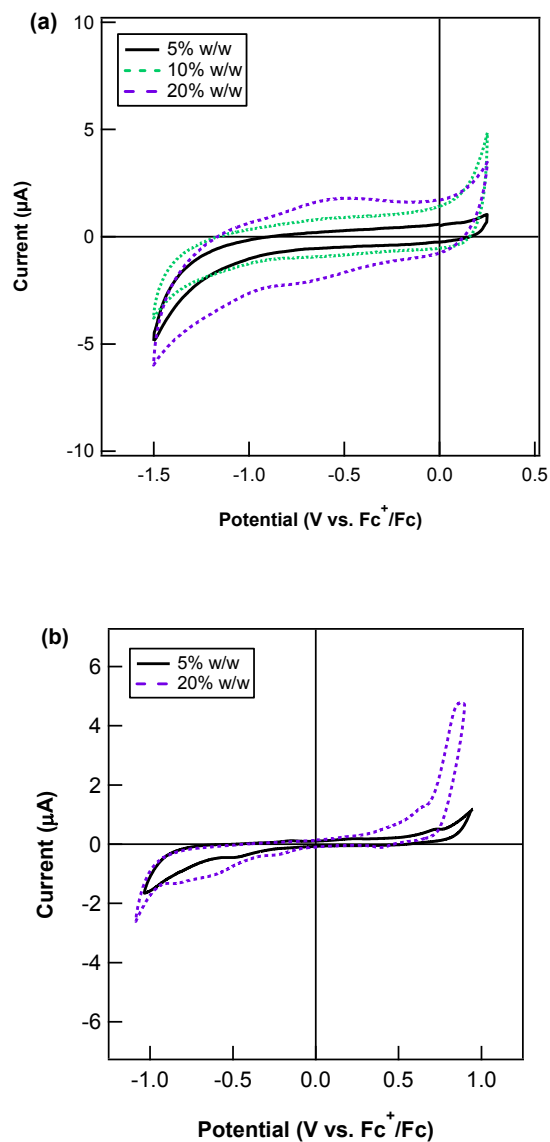

**Figure S4.** Representative cyclic voltammetry profiles for (a) solutions of 5, 10 and 20% w/w  $[\text{P}_{6,6,6,14}][\text{BMB}]$  in PC performed in the electrochemical NR cell after performing neutron reflectivity measurements and (b) solutions of 5 and 20% w/w  $[\text{P}_{6,6,6,14}][\text{BMB}]$  in PC in the electrochemical AFM cell. The potential is given with respect to  $E_{1/2}(\text{Fc}^+/\text{Fc})$ . The scan rate is 10 mV/s.

## IR measurements

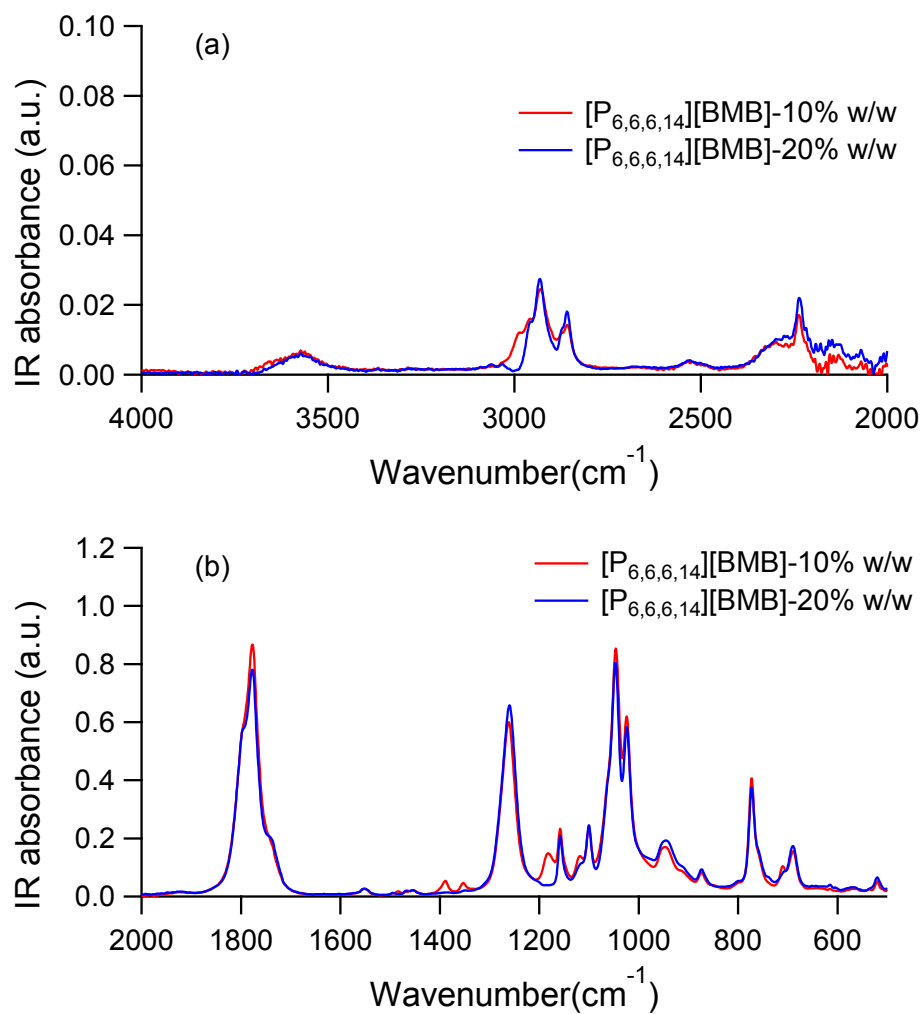

**Figure S5.** IR spectra of 10, 20% w/w [P<sub>6,6,6,14</sub>][BMB] in PC solutions in the wave range of (a) 4000 – 2000cm<sup>-1</sup> and (b) 2000 – 500 cm<sup>-1</sup>. Water shows broad O-H stretching mode peaks with wave range of 3400 – 3700 cm<sup>-1</sup>. Peaks at 3500 – 3650 cm<sup>-1</sup> are assigned to overtone peaks of C=O stretching by comparing with spectra of pure [P<sub>6,6,6,14</sub>][BMB] and PC.

## Current stabilisation during NR measurements

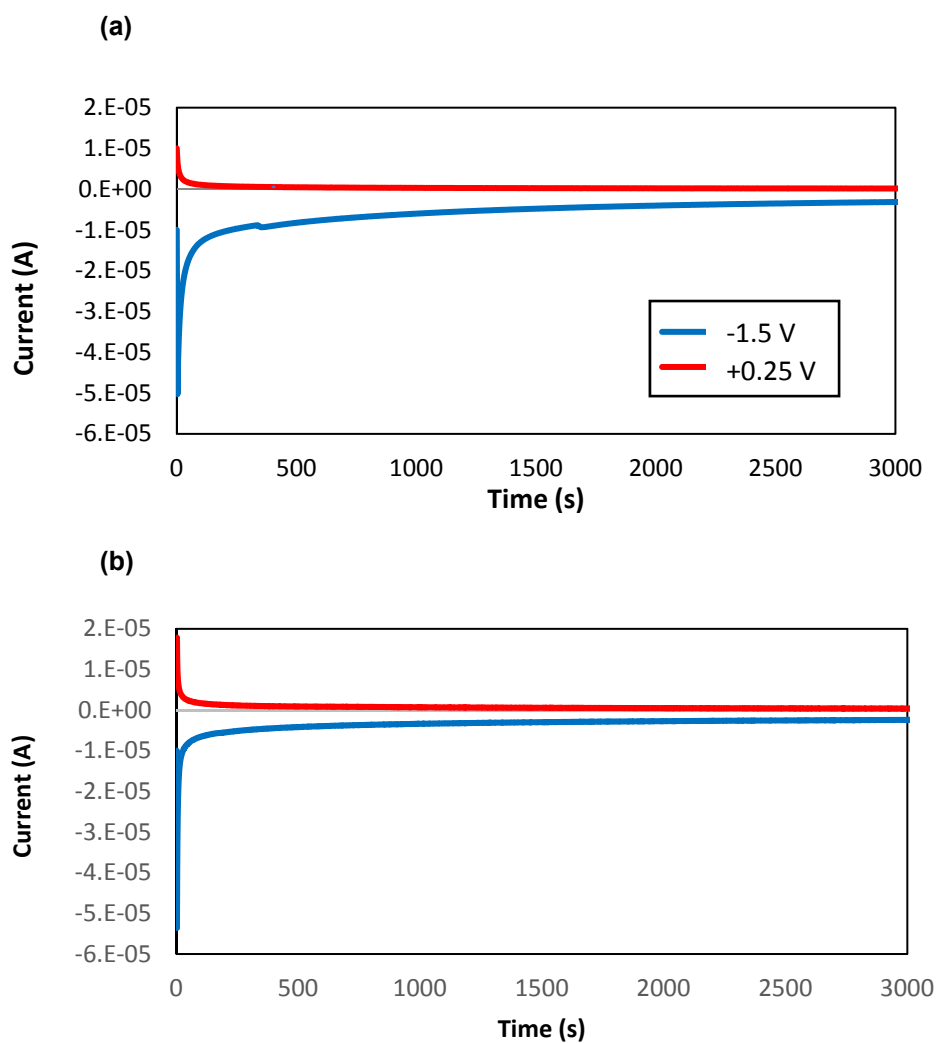

**Figure S6.** Current across the NR cell after application of different potentials plotted as a function of time for a (a) 5 and (b) 20% w/w solution of  $[P_{6,6,6,14}][BMB]$  in PC. (Data for the 10% w/w solution is not presented due to a data saving error.)
